# Supplementary material for: Serum 8-isoprostane levels in patients with resistant oral lichen planus before and after treatment with lycopene: a randomized clinical trial
Source: PubMed Central journal article supplement (PMC8281687; doi:10.1186/s12903-021-01711-z), 2021-07-15
Supplement: 12903_2021_1711_MOESM1_ESM.pdf [file 12903_2021_1711_MOESM1_ESM.pdf]

**Serum 8-isoprostane levels in patients with resistant oral lichen  
planus before and after treatment with lycopene: A  
Randomized Clinical Trial**

Aliaa Abdelmoniem Bedeir Eita\*, Azza Mohamed Zaki,  
Sabah Abdelhady Mahmoud

**Supplementary Table S1: Median, Inter Quartile Range (IQR) and inter-group comparisons of Escudier et al. lesion scores at all assessment times**

| Site score      | Lycopene group<br>(n=10) | Corticosteroids group<br>(n=10) | Mann Whitney U<br>p value |
|-----------------|--------------------------|---------------------------------|---------------------------|
|                 | Median (IQR)             |                                 |                           |
| <b>Baseline</b> | 4.00 (2.75, 6.00)        | 3.00 (2.75, 4.50)               | P = 0.25                  |
| <b>4 weeks</b>  | 4.00 (1.75, 4.50)        | 2.00 (1.00, 2.50)               | P = 0.09                  |
| <b>8 weeks</b>  | 3.50 (1.75, 4.50)        | 2.00 (1.00, 2.00)               | P = 0.09                  |
| Severity score  | Median (IQR)             |                                 | Mann Whitney U<br>p value |
| <b>Baseline</b> | 4.00 (3.00, 5.00)        | 5.90 (4.50, 6.75)               | P = 0.08                  |
| <b>4 weeks</b>  | 2.50 (1.00, 5.00)        | 2.00 (1.00, 4.75)               | P = 0.91                  |
| <b>8 weeks</b>  | 1.00 (0.00, 2.50)        | 2.00 (1.00, 3.25)               | P = 0.28                  |
| Activity score  | Median (IQR)             |                                 | Mann Whitney U<br>p value |
| <b>Baseline</b> | 6.50 (5.00, 8.25)        | 8.00 (5.00, 10.00)              | P = 0.63                  |
| <b>4 weeks</b>  | 4.50 (1.00, 7.25)        | 2.00 (1.00, 4.75)               | P = 0.53                  |
| <b>8 weeks</b>  | 1.50 (0.00, 3.00)        | 2.00 (1.00, 3.25)               | P = 0.44                  |

\*statistically significant at p value < 0.05

n: number of patients
